# Supplementary material for: New Advanced Liquid Crystalline Materials Bearing Bis-Azomethine as Central Spacer
Source: MDPI journal article supplement (doi:10.3390/polym14061256), 2022-03-21
Supplement: s1 [file s1]

## Supplementary data

### *New advanced liquid crystalline materials bearing bis azomethine as central spacer*

Fowzia S. Alamro<sup>1</sup>, Hoda A. Ahmed<sup>2,3,\*</sup>, Noha S. Bedowr<sup>3</sup>, Muna S. Khushaim<sup>4,5</sup>,  
and Mohamed A. El-atawy<sup>3,6,\*</sup>

<sup>1</sup>Department of Chemistry, College of Science, Princess Nourah bint Abdulrahman University, P.O. Box 84428, Riyadh 11671, Saudi Arabia, [fsalamro@pnu.edu.sa](mailto:fsalamro@pnu.edu.sa)

<sup>2</sup>Department of Chemistry, Faculty of Science, Cairo University, Cairo 12613, Egypt.

<sup>3</sup>Chemistry Department, College of Sciences, Yanbu, Taibah University, Yanbu 30799, Saudi Arabia; [nbedowr@taibahu.edu.sa](mailto:nbedowr@taibahu.edu.sa) (N S.B)

<sup>4</sup>Department of Physics, Faculty of Science, Taibah University, P. Box: 30002, Al-Madina 41447, Saudi Arabia; [mkhushaim@taibahu.edu.sa](mailto:mkhushaim@taibahu.edu.sa)

<sup>5</sup>Nanotechnolgy Center, Taibah University, P. Box: 30002, Al-Madina 41447, Saudi Arabia

<sup>6</sup>Chemistry Department, Faculty of Science, Alexandria University, P.O. 426 Ibrahimia, Alexandria, 21321, Egypt

\*Correspondence: author: Hoda A. Ahmed: [ahoda@sci.cu.edu.eg](mailto:ahoda@sci.cu.edu.eg) and Mohamed A. El-atawy: [mohamed.elatawi@alexu.edu.eg](mailto:mohamed.elatawi@alexu.edu.eg)

#### 1. Materials

Hexadecanoyl chloride, decanoyl chloride, hexanoyl chloride, 4-hydroxybenzaldehyde, and hydrazine hydrate were purchased from Sigma Aldrich (Germany). 4-dimethylaminopyridine (DMAP), Dichloromethane, and triethylamine were purchased from Aldrich (Wisconsin, USA).

#### 2. Synthesis of 4,4'-((1E,1'E)-hydrazine-1,2-diylidenebis(methanylylidene))diphenol (A)

An ethanolic solution of p-hydroxy benzaldehyde (1.00 g, 8.20 mmol) was added dropwise to ethanolic solution of hydrazine monohydrate (0.200 g, 4.10 mmol) and resulting mixture was refluxed for 30 min. and then kept under stirring for 3-4 hours at room temperature till the starting materials are consumed, as indicated from TLC. A yellow precipitate formed, was washed with ethanol and diethyl ether and dried under vacuum.

### 3. Synthesis of ((1E,1'E)-hydrazine-1,2-diylidenebis(methanylylidene))bis(4,1-phenylene) dialkanoate, **1n**

To a solution of the diphenol, 4,4'-((1E,1'E)-hydrazine-1,2-diylidenebis(methanylylidene))diphenol (**A**), 10 mmol in 30 mL of DCM, Triethylamine (Et<sub>3</sub>N) (20 mmol), dimethylaminopyridine (DMAP) (1 mmol) and the corresponding acyl chloride (12 mmol) were added at 0 °C and stirred. The reaction mixture was allowed to reach room temperature and was kept under stirring overnight at room temperature. The solvent was evaporated under reduced pressure, and the resultant oily residue dissolved in water and extracted with diethyl ether (3×30 mL). The combined organic phases were dried over anhydrous sodium sulfate (Na<sub>2</sub>SO<sub>4</sub>) and filtered off and the solution evaporated till dryness under reduced pressure. Finally, purification by column chromatography afforded the desired liquid crystals, **1n**.

#### 4,4'-((1E,1'E)-hydrazine-1,2-diylidenebis(methanylylidene))diphenol (**A**)

Yield: 93%; mp 107.0 °C, FTIR ( $\nu$ , cm<sup>-1</sup>): 3400-3200 (OH), 2960, 2875 (CH<sub>2</sub> stretching), 1590 (C=N), 1610 (C=C). <sup>1</sup>H NMR (400 MHz, DMSO)  $\delta$  8.55 (s, 2H, CH=N), 7.70 (d,  $J$  = 8.3 Hz, 4H, Ar-H), 6.87 (d,  $J$  = 8.2 Hz, 4H, Ar-H). <sup>13</sup>C NMR (101 MHz, DMSO)  $\delta$  160.87 (CH), 160.75 (C), 130.58 (CH), 125.58 (C), 116.22 (CH). Elemental analyses: Found (Calc.): C, 69.99 (70.12); H, 5.03 (5.25); N, 11.66 (11.76).

### 2.2. ((1E,1'E)-hydrazine-1,2-diylidenebis(methanylylidene))bis(4,1-phenylene) dihexanoate, **15**

Yield: 94%; mp 95.0 °C, FTIR ( $\nu$ , cm<sup>-1</sup>): 2950, 2885 (CH<sub>2</sub> stretching), 1763 (C=O), 1592 (C=N), 1600 (C=C). <sup>1</sup>H NMR (400 MHz, CDCl<sub>3</sub>)  $\delta$  8.65 (s, 2H, CH=N), 7.87 (d,  $J$  = 8.6 Hz, 4H, Ar-H), 7.20 (d,  $J$  = 8.5 Hz, 4H, Ar-H), 2.59 (t,  $J$  = 7.5 Hz, 4H, 2 CH<sub>2</sub>CO), 1.90 – 1.64 (m, 4H, 2CH<sub>2</sub>), 1.41 (m, 8H, 4CH<sub>2</sub>), 0.95 (t,  $J$  = 7.0 Hz, 6H, 2CH<sub>3</sub>). <sup>13</sup>C NMR (101 MHz, CDCl<sub>3</sub>)  $\delta$  171.98 (CO), 161.12 (CH), 153.03 (C), 131.60 (C), 129.75 (CH), 122.10 (CH), 45.88 (CH<sub>2</sub>), 34.38 (CH<sub>2</sub>), 31.25 (CH<sub>2</sub>), 24.57 (CH<sub>2</sub>), 22.33 (CH<sub>2</sub>), 13.93 (CH<sub>3</sub>). Elemental analyses: Found (Calc.): C, 71.53 (71.36); H, 7.39 (7.18); N, 6.42 (6.53).

### ((1E,1'E)-hydrazine-1,2-diylidenebis(methanylylidene))bis(4,1-phenylene) didecanoate, **19**

Yield: 89 %; mp 104.0 °C, FTIR ( $\nu$ , cm<sup>-1</sup>): 2970, 2870 (CH<sub>2</sub> stretching), 1765 (C=O), 1595 (C=N), 1610 (C=C). <sup>1</sup>H NMR (400 MHz, CDCl<sub>3</sub>)  $\delta$  8.65 (s, 2H, CH=N),

7.87 (d,  $J = 8.6$  Hz, 4H, Ar-H), 7.20 (d,  $J = 8.5$  Hz, 4H, Ar-H), 2.59 (t,  $J = 7.5$  Hz, 4H, 2CH<sub>2</sub>), 2.40 (t,  $J = 7.5$  Hz, 4H, 2CH<sub>2</sub>), 1.82 – 1.73 (m, 4H, 2CH<sub>2</sub>), 1.63 – 1.52 (m, 6H, 3CH<sub>2</sub>), 1.28 (s, 14H, 7CH<sub>2</sub>), 0.93 – 0.87 (m, 6H, 2CH<sub>3</sub>). <sup>13</sup>C NMR (101 MHz, CDCl<sub>3</sub>)  $\delta$  172.00 (CO), 161.13 (CH), 153.03 (C), 131.59 (C), 129.75 (CH), 122.10 (CH), 116.05 (CH), 42.83 (CH<sub>2</sub>), 34.42 (CH<sub>2</sub>), 31.87 (CH<sub>2</sub>), 29.44 (CH<sub>2</sub>), 29.43 (CH<sub>2</sub>), 29.27 (CH<sub>2</sub>), 29.26 (CH<sub>2</sub>), 29.10 (CH<sub>2</sub>), 24.89 (CH<sub>2</sub>), 23.91 (CH<sub>2</sub>), 22.67 (CH<sub>2</sub>), 14.11(CH<sub>3</sub>). Elemental analyses: Found (Calc.): C, 74.42 (74.38); H, 8.82 (9.10); N, 5.10 (5.25).

#### 4. Characterization

Perkin-Elmer B25 (Perkin-Elmer, Inc., Shelton, CT USA) spectrophotometer was used for infrared spectra measurements. Varian EM 350L 400 MHz spectrometer (Oxford, UK) was used for recording <sup>1</sup>H NMR spectra with tetramethyl silane as internal standard in CDCl<sub>3</sub>; the chemical shift values recorded as  $\delta$  (ppm units). Thermo Scientific Flash 2000 CHS/O Elemental Analyzer, Milan, Italy was used for Elemental analyses. TA Instruments Co. (Q20 Differential Scanning Calorimeter, DSC; USA) was used for recording phase transitions. DSC calibration was carried using lead and indium melting temperature and enthalpy. Samples of 2–3 mg were used in aluminum pans for DSC investigation. The heating rate was 10°C/min in nitrogen gas as an inert atmosphere (30 ml/min). All transitions measured for the second heating scan. Transition temperatures for the prepared compounds were checked and phases identified by Polarized optical microscope (POM, Wild, Germany) attached with Mettler FP82HT hot stage. Absorption spectra of prepared films were recorded through Agilent Cary 5000 UV-Vis-NIR spectrophotometer. The steady state emission and time resolved decay spectra were recorded through Horiba delta flex TCSPC lifetime fluorometer by exciting the sample from Delta-diode 320 nm with peak width  $\pm 10$  nm.

#### 5. Computational Method

Gaussian 09 software [1] was used for DFT calculations for the studied compounds. DFT/B3LYP methods using 6-31G ( $d,p$ ) basis set was selected for the calculations. The geometries were optimized by minimizing the energies with respect to all geometrical parameters without imposing any molecular symmetry constraints. The

structures of the optimized geometries had been drawn with Gauss View [2]. Also, calculations frequencies were carried out by the same level of theory. The frequency calculations showed that all structures were stationary points in the geometry optimization method with non-imaginary frequencies.

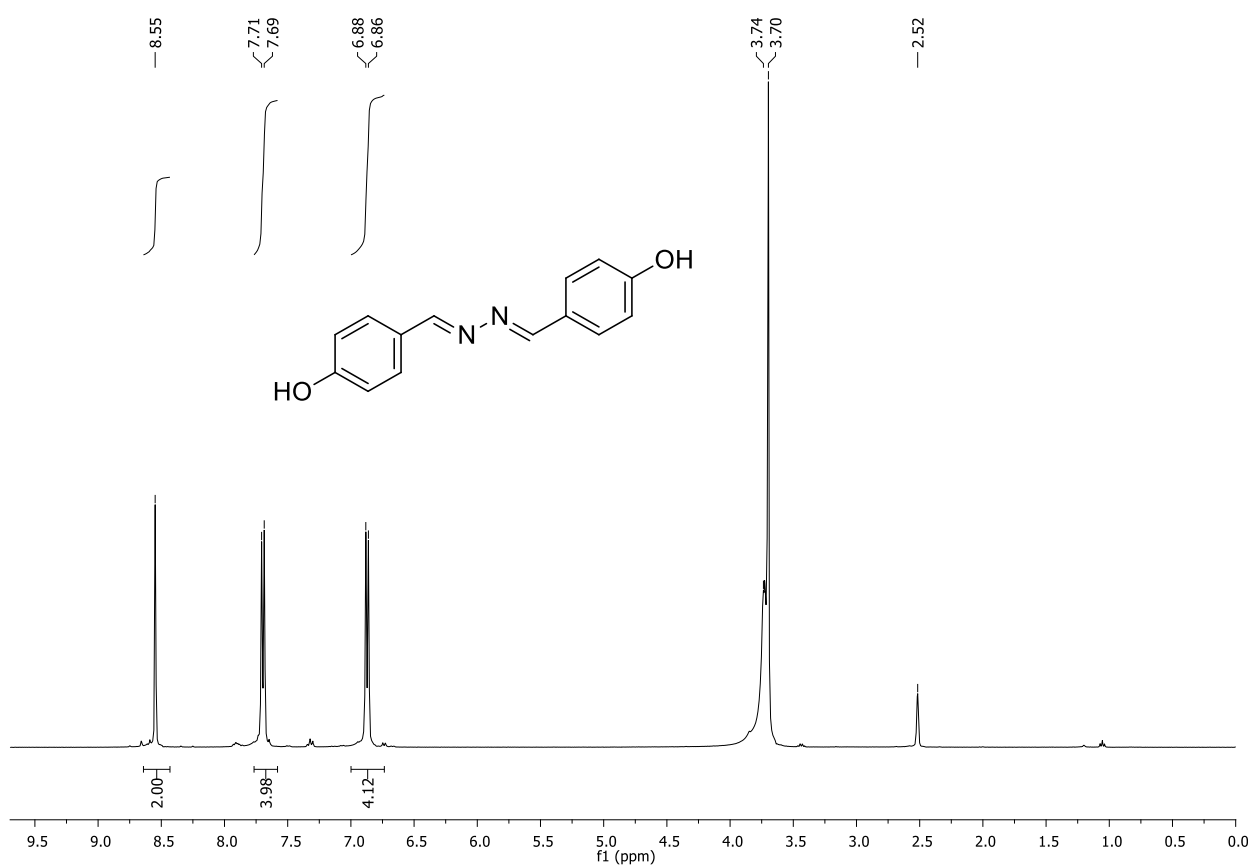

**Figure S1.** <sup>1</sup>H-NMR of 4,4'-((1E,1'E)-hydrazine-1,2-diylidenebis(methanylylidene))diphenol.

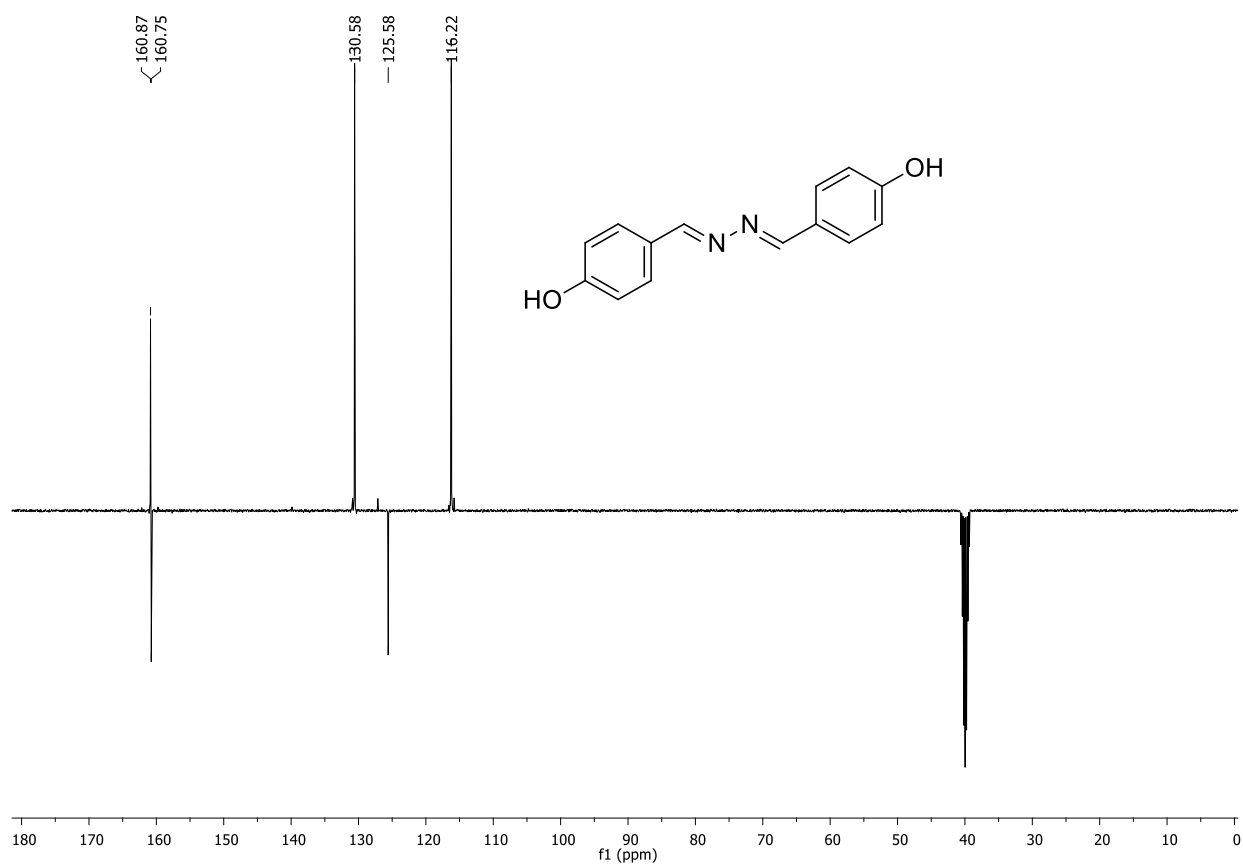

**Figure S2.**  $^{13}\text{C}$ -NMR of 4,4'-((1E,1'E)-hydrazine-1,2-diylidenebis(methanylylidene))diphenol.

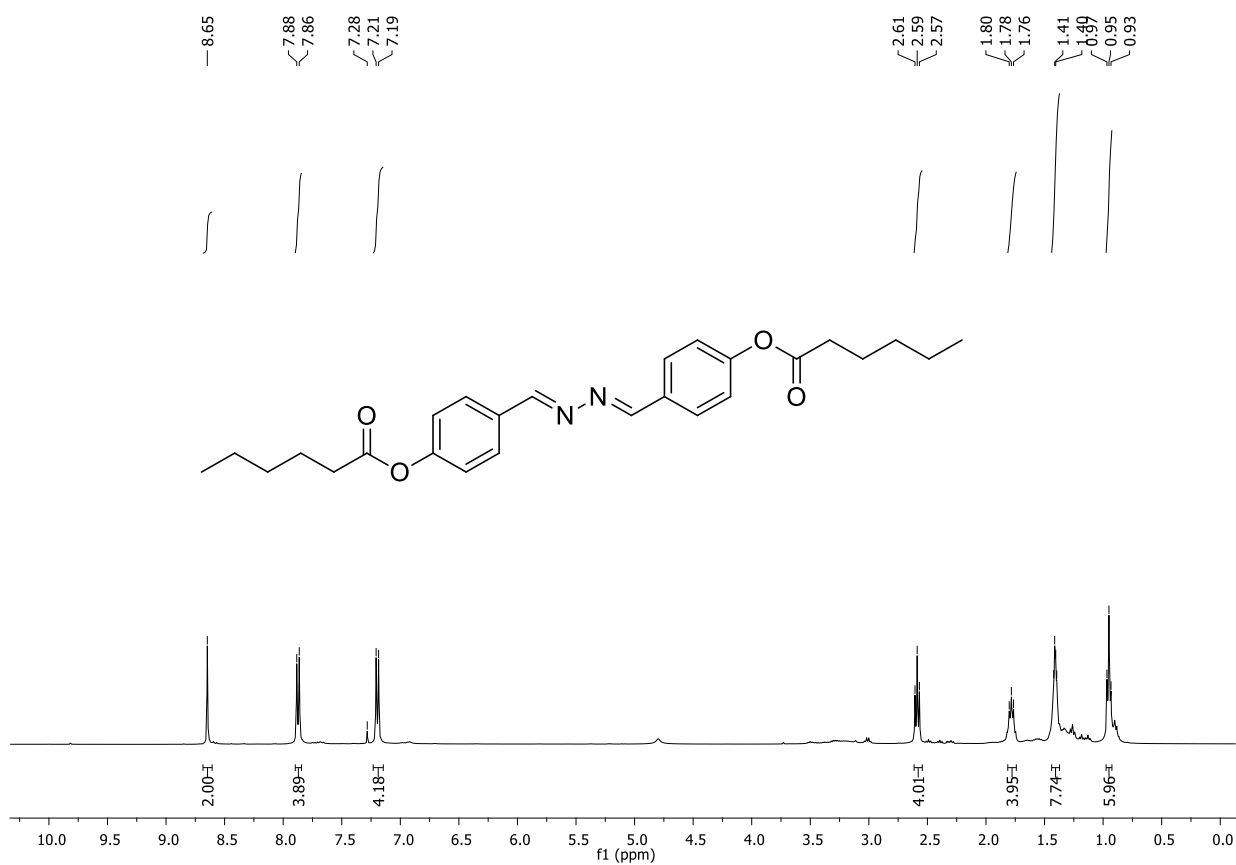

**Figure S3.** <sup>1</sup>H-NMR of ((1E,1'E)-hydrazine-1,2-diylidenebis(methanylylidene))bis(4,1-phenylene) dihexanoate.

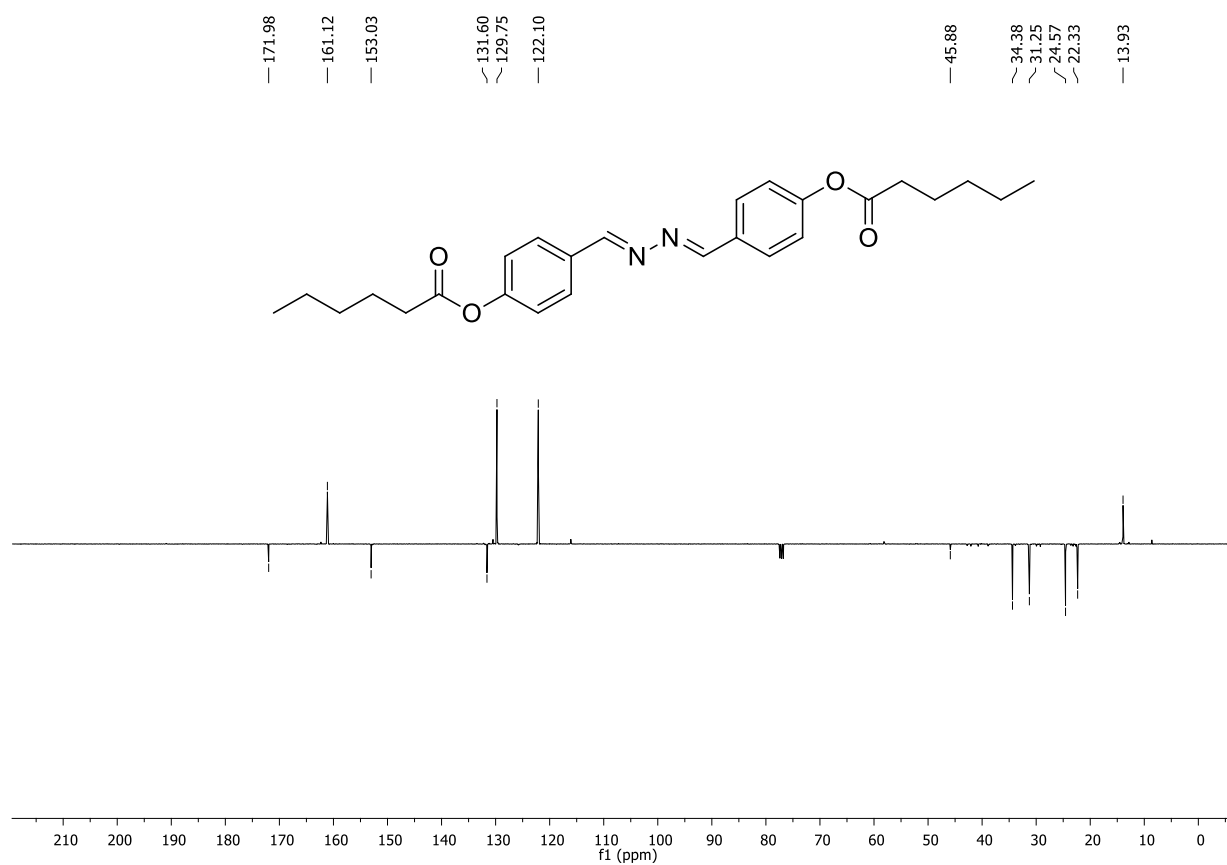

**Figure S4.** <sup>13</sup>C-NMR of ((1E,1'E)-hydrazine-1,2-diylidenebis(methanylylidene))bis(4,1-phenylene) dihexanoate.

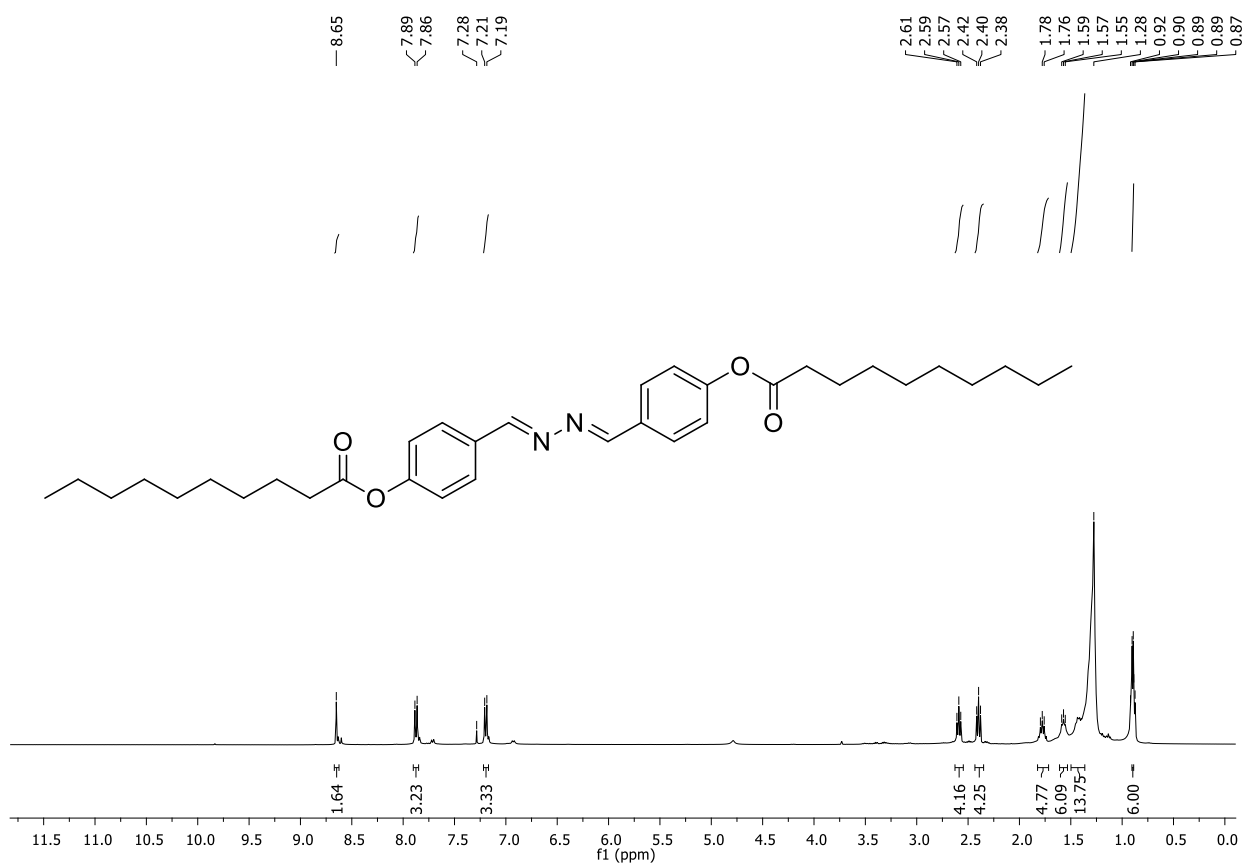

**Figure S5.** <sup>1</sup>H-NMR of ((1E,1'E)-hydrazine-1,2-diylidenebis(methanylylidene))bis(4,1-phenylene) bis(decanoate).



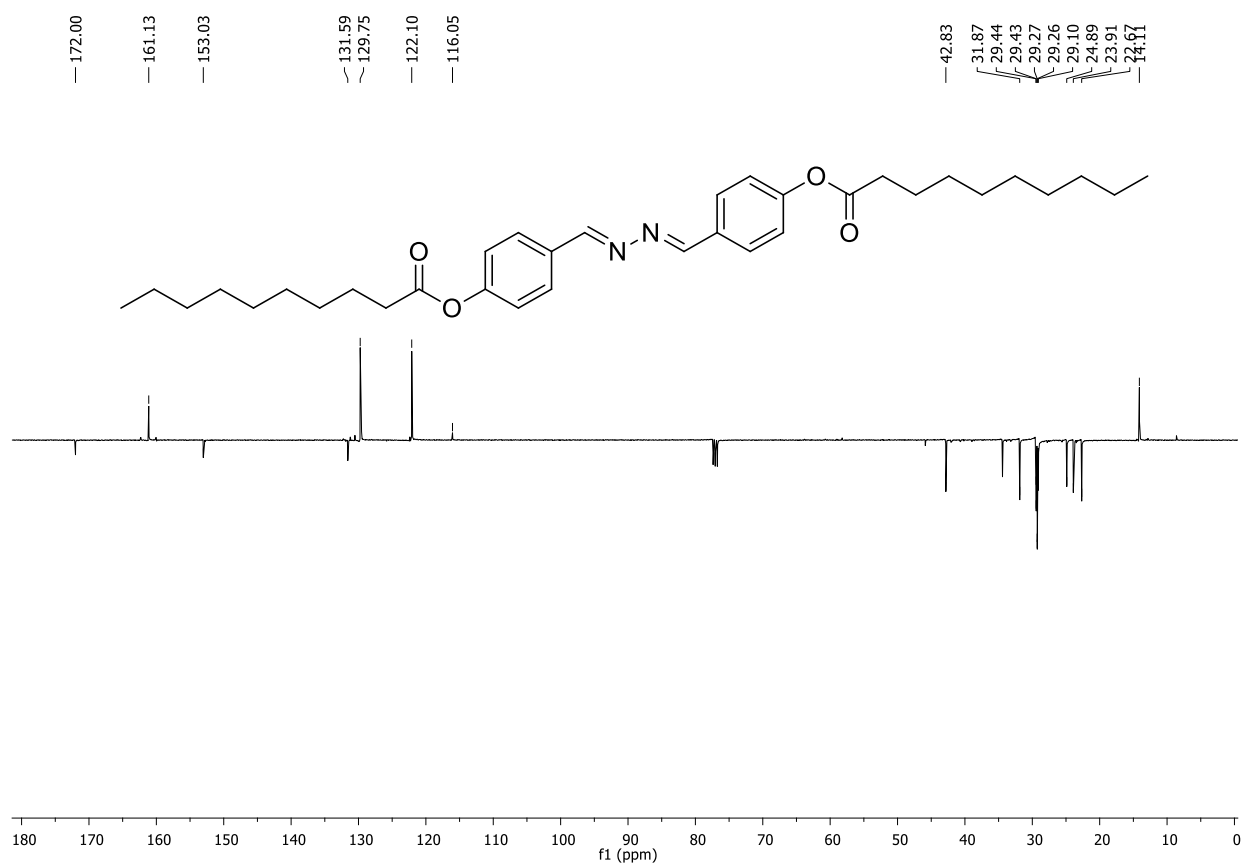

**Figure S6.** <sup>13</sup>C-NMR of ((1E,1'E)-hydrazine-1,2-diylidenebis(methanylylidene))bis(4,1-phenylene) bis(decanoate).

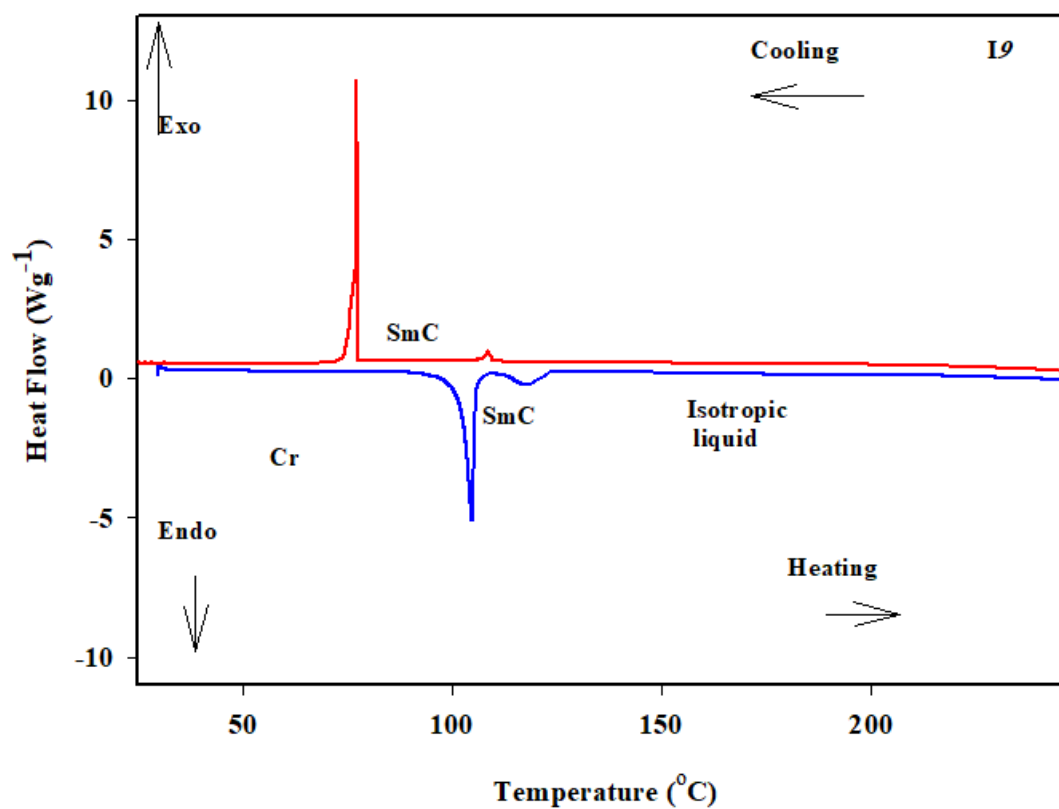

**Figure S7.** DSC cycles recorded from the second heating and cooling scan with heating rate  $10^{\circ}\text{C}/\text{min}$  of compound **19**.

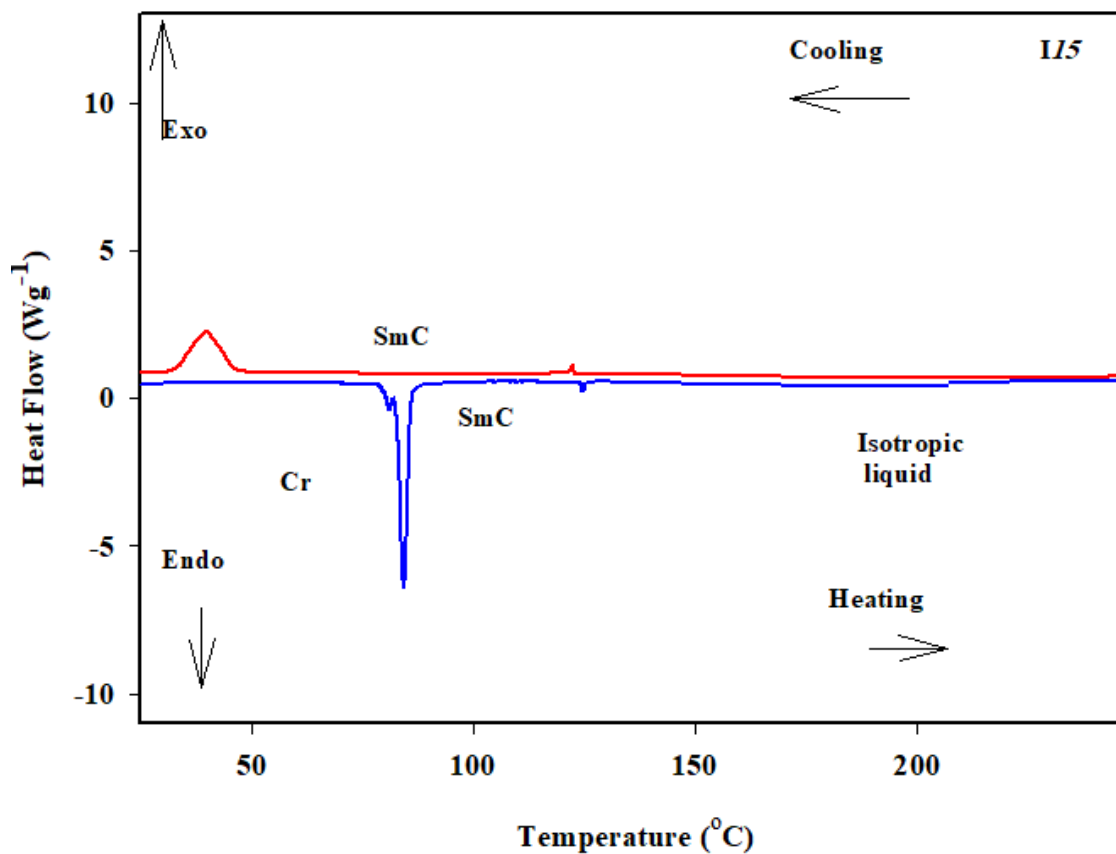

**Figure S8.** DSC cycles recorded from the second heating and cooling scan with heating rate 10°C/min of compound **I15**.

## 6. Optimized geometrical structure of *In* derivatives with atom numbering

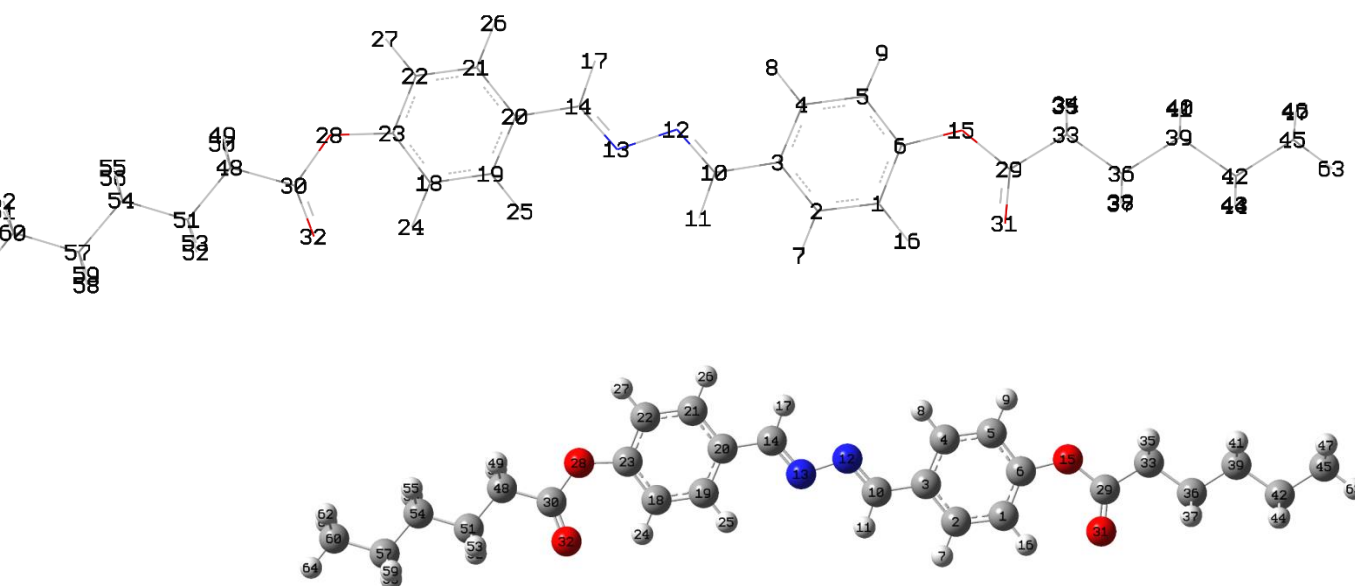

|              | Dihedral    | Angle     | Bond | NC | NB | NA | Symbol | Tag |
|--------------|-------------|-----------|------|----|----|----|--------|-----|
|              |             |           |      |    |    |    | C      | 1   |
|              |             | 1.3966194 |      |    |    | 1  | C      | 2   |
|              | 121.7091586 | 1.4045293 |      |    | 1  | 2  | C      | 3   |
| -0.0031870   | 118.5775241 | 1.4106606 | 1    | 2  | 3  |    | C      | 4   |
| -0.0071474   | 120.3927458 | 1.3862245 | 2    | 3  | 4  |    | C      | 5   |
| 0.0078579    | 118.2764390 | 1.3964221 | 3    | 2  | 1  |    | C      | 6   |
| -179.9886906 | 118.8246388 | 1.0826139 | 6    | 1  | 2  |    | H      | 7   |
| -179.9786508 | 118.7912717 | 1.0798997 | 2    | 3  | 4  |    | H      | 8   |
| -179.9828726 | 121.5328186 | 1.0799608 | 3    | 4  | 5  |    | H      | 9   |
| -179.9522414 | 119.5615235 | 1.4580159 | 1    | 2  | 3  |    | C      | 10  |
| 0.2343444    | 118.1103784 | 1.0891330 | 2    | 3  | 10 |    | H      | 11  |
| -179.7870855 | 122.2051203 | 1.2957630 | 2    | 3  | 10 |    | N      | 12  |
| -179.9152521 | 112.8722999 | 1.4233617 | 3    | 10 | 12 |    | N      | 13  |
| -179.7012349 | 112.8737544 | 1.2955344 | 10   | 12 | 13 |    | C      | 14  |
| -179.9622179 | 125.5230927 | 1.4166022 | 2    | 1  | 6  |    | O      | 15  |
| -179.9768791 | 120.6403512 | 1.0749384 | 5    | 6  | 1  |    | H      | 16  |
| 0.0610689    | 119.6271819 | 1.0893695 | 12   | 13 | 14 |    | H      | 17  |
| -179.8506455 | 104.1829021 | 3.7851091 | 12   | 13 | 14 |    | C      | 18  |
| 0.0418624    | 18.7497830  | 1.3928161 | 13   | 14 | 18 |    | C      | 19  |
| -0.0651611   | 121.4062411 | 1.4070842 | 14   | 18 | 19 |    | C      | 20  |
| -0.0406220   | 118.5589117 | 1.4081010 | 18   | 19 | 20 |    | C      | 21  |
| 0.0069668    | 120.7204108 | 1.3899870 | 19   | 20 | 21 |    | C      | 22  |
| 0.0314301    | 119.4970471 | 1.3965712 | 20   | 21 | 22 |    | C      | 23  |
| 0.4605539    | 139.7266001 | 1.0750402 | 13   | 14 | 18 |    | H      | 24  |
| 179.8935319  | 120.0029939 | 1.0800824 | 14   | 18 | 19 |    | H      | 25  |
| -179.9970909 | 119.6815432 | 1.0825128 | 19   | 20 | 21 |    | H      | 26  |

|              |             |           |    |    |    |   |    |    |
|--------------|-------------|-----------|----|----|----|---|----|----|
| -179.9694732 | 121.6437628 | 1.0797811 | 20 | 21 | 22 |   | H  | 27 |
| -179.8363828 | 113.3498830 | 1.4166771 | 21 | 22 | 23 |   | O  | 28 |
| -0.1717354   | 126.6699231 | 1.3928913 | 1  | 6  | 15 |   | C  | 29 |
| -177.7459515 | 126.7304272 | 1.3934335 | 22 | 23 | 28 |   | C  | 30 |
| -0.2063878   | 124.0162492 | 1.2282106 | 6  | 15 | 29 |   | O  | 31 |
| 0.3059918    | 124.0574336 | 1.2280269 | 23 | 28 | 30 |   | O  | 32 |
| 179.7263608  | 109.5495690 | 1.5050799 | 6  | 15 | 29 |   | C  | 33 |
| -57.6445760  | 107.7710481 | 1.0943446 | 15 | 29 | 33 |   | H  | 34 |
| 55.7650320   | 107.8577915 | 1.0940614 | 15 | 29 | 33 |   | H  | 35 |
| 179.1412433  | 113.3991498 | 1.5331018 | 15 | 29 | 33 |   | C  | 36 |
| -58.1952368  | 109.3336726 | 1.0932667 | 29 | 33 | 36 |   | H  | 37 |
| 57.3622147   | 109.3300552 | 1.0931472 | 29 | 33 | 36 |   | H  | 38 |
| 179.5909179  | 112.4586805 | 1.5374057 | 29 | 33 | 36 |   | C  | 39 |
| -58.1113490  | 109.4951539 | 1.0966432 | 33 | 36 | 39 |   | H  | 40 |
| 57.9616077   | 109.5250175 | 1.0966310 | 33 | 36 | 39 |   | H  | 41 |
| 179.9380233  | 113.1290340 | 1.5382666 | 33 | 42 | C  |   | 39 | 36 |
| 57.7144517   | 109.1062251 | 1.0952189 | 36 | 39 | 43 | H |    | 42 |
| -57.8805188  | 109.1107596 | 1.0952138 | 36 | 39 | 44 | H |    | 42 |
| 179.9193980  | 113.1741888 | 1.5356958 | 36 | 39 | 45 | C |    | 42 |
| -59.9614263  | 111.1455256 | 1.0929956 | 39 | 42 | 46 | H |    | 45 |
| 59.9197315   | 111.1457512 | 1.0929977 | 39 | 42 | 47 | H |    | 45 |
| -179.4502088 | 109.4721199 | 1.5051355 | 23 | 28 | 48 | C |    | 30 |
| -50.7047622  | 107.9614947 | 1.0933876 | 28 | 30 | 49 | H |    | 48 |
| 62.7227970   | 107.6345488 | 1.0949987 | 28 | 30 | 50 | H |    | 48 |
| -174.3582688 | 113.4604135 | 1.5331963 | 28 | 30 | 51 | C |    | 48 |
| -56.6014994  | 109.3581103 | 1.0929120 | 30 | 48 | 52 | H |    | 51 |
| 58.9860889   | 109.3148966 | 1.0935111 | 30 | 48 | 53 | H |    | 51 |

|              |             |           |    |    |    |   |    |
|--------------|-------------|-----------|----|----|----|---|----|
| -178.9136511 | 112.3964394 | 1.5373725 | 30 | 48 | 54 | C | 51 |
| -57.3334174  | 109.5149728 | 1.0966969 | 48 | 51 | 55 | H | 54 |
| 58.7140904   | 109.4801151 | 1.0966485 | 48 | 51 | 56 | H | 54 |
| -179.2977404 | 113.1796006 | 1.5382120 | 48 | 51 | 57 | C | 54 |
| -57.7343277  | 109.1312844 | 1.0952441 | 51 | 54 | 58 | H | 57 |
| 57.8647765   | 109.0976924 | 1.0952182 | 51 | 54 | 59 | H | 57 |
| -179.9497556 | 113.1594181 | 1.5356699 | 51 | 54 | 60 | C | 57 |
| 59.9365214   | 111.1470014 | 1.0929949 | 54 | 57 | 61 | H | 60 |
| -59.9398069  | 111.1443109 | 1.0930276 | 54 | 57 | 62 | H | 60 |
| 179.9799186  | 111.3125704 | 1.0918133 | 39 | 42 | 63 | H | 45 |
| 179.9938624  | 111.3139514 | 1.0918015 | 54 | 57 | 64 | H | 60 |

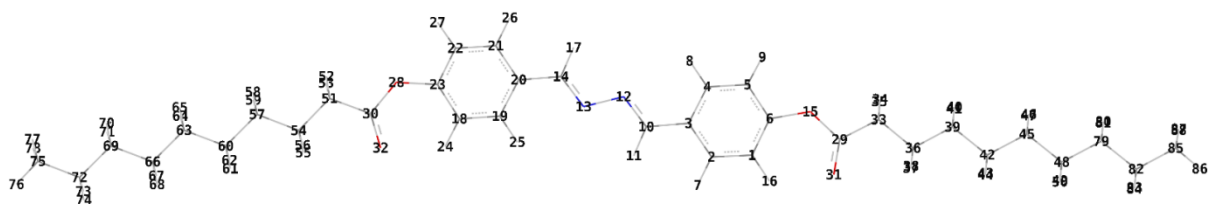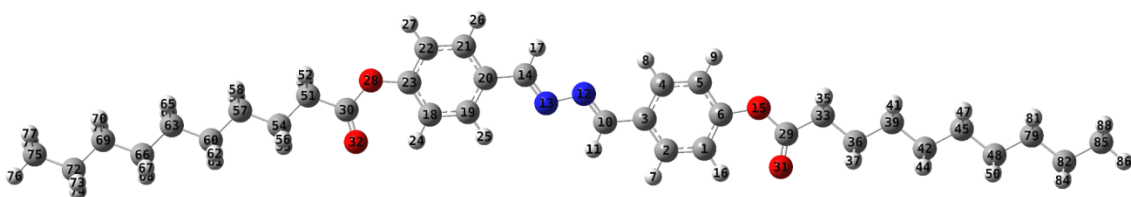

| Angle | Bond      | NC | NB | NA | Symbol<br>Dihedral | Tag |
|-------|-----------|----|----|----|--------------------|-----|
|       |           |    |    |    | C                  | 1   |
|       | 1.3966592 |    |    | 1  | C                  | 2   |

|           |    |    |                          |    |
|-----------|----|----|--------------------------|----|
| 1.4045304 | 1  | 2  | C                        | 3  |
|           |    |    | 121.7110729              |    |
| 1.4106600 | 1  | 2  | 3                        | 4  |
|           |    |    | -0.0248376 118.5763596   |    |
| 1.3862071 | 2  | 3  | 4                        | 5  |
|           |    |    | 0.0156822 120.3912076    |    |
| 1.3963883 | 3  | 2  | 1                        | 6  |
|           |    |    | 0.0052369 118.2748328    |    |
| 1.0826192 | 6  | 1  | 2                        | 7  |
|           |    |    | 179.9874894 118.8277205  |    |
| 1.0798958 | 2  | 3  | 4                        | 8  |
|           |    |    | -179.9672761 118.7985806 |    |
| 1.0799680 | 3  | 4  | 5                        | 9  |
|           |    |    | 179.9965837 121.5345246  |    |
| 1.4580307 | 1  | 2  | 3                        | 10 |
|           |    |    | 179.9764421 119.5801388  |    |
| 1.0891358 | 2  | 3  | 10                       | 11 |
|           |    |    | 0.2782229 118.1232934    |    |
| 1.2957443 | 2  | 3  | 10                       | 12 |
|           |    |    | -179.7037538 122.1840955 |    |
| 1.4233891 | 3  | 10 | 12                       | 13 |
|           |    |    | -179.9835915 112.8925088 |    |
| 1.2955493 | 10 | 12 | 13                       | 14 |
|           |    |    | -179.5396516 112.8535955 |    |
| 1.4164574 | 2  | 1  | 6                        | 15 |
|           |    |    | -179.8452165 125.5254414 |    |
| 1.0749444 | 5  | 6  | 1                        | 16 |
|           |    |    | -179.9393348 120.6431780 |    |
| 1.0893708 | 12 | 13 | 14                       | 17 |
|           |    |    | 0.0279063 119.6168034    |    |
| 3.7851191 | 12 | 13 | 14                       | 18 |
|           |    |    | -179.9338911 104.2058967 |    |
| 1.3928382 | 13 | 14 | 18                       | 19 |
|           |    |    | 0.2377507 18.7563773     |    |

|           |    |              |             |   |    |
|-----------|----|--------------|-------------|---|----|
| 1.4070844 | 14 | 18           | 19          | C | 20 |
|           |    | 0.0090650    | 121.4015229 |   |    |
| 1.4081018 | 18 | 19           | 20          | C | 21 |
|           |    | -0.0228484   | 118.5572375 |   |    |
| 1.3899803 | 19 | 20           | 21          | C | 22 |
|           |    | -0.0285912   | 120.7255968 |   |    |
| 1.3965455 | 20 | 21           | 22          | C | 23 |
|           |    | 0.0528901    | 119.4959511 |   |    |
| 1.0750727 | 13 | 14           | 18          | H | 24 |
|           |    | 0.6933319    | 139.7130345 |   |    |
| 1.0800878 | 14 | 18           | 19          | H | 25 |
|           |    | 179.9870960  | 119.9957460 |   |    |
| 1.0825174 | 19 | 20           | 21          | H | 26 |
|           |    | 179.9905120  | 119.6732103 |   |    |
| 1.0797742 | 20 | 21           | 22          | H | 27 |
|           |    | -179.9171343 | 121.6423091 |   |    |
| 1.4166505 | 21 | 22           | 23          | O | 28 |
|           |    | -179.6077708 | 113.3520813 |   |    |
| 1.3930088 | 1  | 6            | 15          | C | 29 |
|           |    | -0.5615891   | 126.6904738 |   |    |
| 1.3934917 | 22 | 23           | 28          | C | 30 |
|           |    | -176.4233872 | 126.7101882 |   |    |
| 1.2281969 | 6  | 15           | 29          | O | 31 |
|           |    | -0.4694964   | 124.0166628 |   |    |
| 1.2279968 | 23 | 28           | 30          | O | 32 |
|           |    | 0.5901393    | 124.0397184 |   |    |
| 1.5049911 | 6  | 15           | 29          | C | 33 |
|           |    | 179.4033535  | 109.5136198 |   |    |
| 1.0944630 | 15 | 29           | 33          | H | 34 |
|           |    | -58.1587664  | 107.7185009 |   |    |
| 1.0940050 | 15 | 29           | 33          | H | 35 |
|           |    | 55.2202543   | 107.8734487 |   |    |
| 1.5330631 | 15 | 29           | 33          | C | 36 |
|           |    | 178.6748589  | 113.4629825 |   |    |



|           |    |              |             |   |    |
|-----------|----|--------------|-------------|---|----|
| 1.0932943 | 29 | 33           | 36          | H | 37 |
|           |    | -58.6557345  | 109.3542761 |   |    |
| 1.0930979 | 29 | 33           | 36          | H | 38 |
|           |    | 56.9296159   | 109.3348649 |   |    |
| 1.5376007 | 29 | 33           | 36          | C | 39 |
|           |    | 179.1350597  | 112.3908725 |   |    |
| 1.0965521 | 33 | 36           | 39          | H | 40 |
|           |    | -58.1828425  | 109.4133243 |   |    |
| 1.0965374 | 33 | 36           | 39          | H | 41 |
|           |    | 57.8236407   | 109.4758518 |   |    |
| 1.5379544 | 33 | 36           | 39          | C | 42 |
|           |    | 179.8453750  | 113.1555998 |   |    |
| 1.0961148 | 36 | 39           | 42          | H | 43 |
|           |    | 57.5437043   | 109.1973483 |   |    |
| 1.0960991 | 36 | 39           | 42          | H | 44 |
|           |    | -58.1826580  | 109.2071275 |   |    |
| 1.5381012 | 36 | 39           | 42          | C | 45 |
|           |    | 179.6678368  | 113.4472264 |   |    |
| 1.0964487 | 39 | 42           | 45          | H | 46 |
|           |    | -57.9885964  | 109.2168182 |   |    |
| 1.0964611 | 39 | 42           | 45          | H | 47 |
|           |    | 57.7636214   | 109.2380560 |   |    |
| 1.5381757 | 39 | 42           | 45          | C | 48 |
|           |    | 179.8937256  | 113.5221957 |   |    |
| 1.0964086 | 42 | 45           | 48          | H | 49 |
|           |    | 57.7083213   | 109.2170142 |   |    |
| 1.0963889 | 42 | 45           | 48          | H | 50 |
|           |    | -58.0179450  | 109.2192350 |   |    |
| 1.5051112 | 23 | 28           | 30          | C | 51 |
|           |    | -179.0577404 | 109.4922051 |   |    |
| 1.0931512 | 28 | 30           | 51          | H | 52 |
|           |    | -49.3889298  | 108.0343763 |   |    |
| 1.0951997 | 28 | 30           | 51          | H | 53 |
|           |    | 64.0670232   | 107.5712042 |   |    |

|           |    |              |             |   |    |
|-----------|----|--------------|-------------|---|----|
| 1.5332542 | 28 | 30           | 51          | C | 54 |
|           |    | -173.1462031 | 113.4456812 |   |    |
| 1.0928006 | 30 | 51           | 54          | H | 55 |
|           |    | -55.8059244  | 109.3525535 |   |    |
| 1.0935992 | 30 | 51           | 54          | H | 56 |
|           |    | 59.7841302   | 109.3076299 |   |    |
| 1.5376023 | 30 | 51           | 54          | C | 57 |
|           |    | -178.1200859 | 112.3931582 |   |    |
| 1.0965566 | 51 | 54           | 57          | H | 58 |
|           |    | -57.0677638  | 109.4885017 |   |    |
| 1.0965516 | 51 | 54           | 57          | H | 59 |
|           |    | 58.9410594   | 109.4023590 |   |    |
| 1.5379369 | 51 | 54           | 57          | C | 60 |
|           |    | -179.0702894 | 113.1571630 |   |    |
| 1.0960904 | 54 | 57           | 60          | H | 61 |
|           |    | -57.4119064  | 109.2138511 |   |    |
| 1.0961055 | 54 | 57           | 60          | H | 62 |
|           |    | 58.3111370   | 109.1834686 |   |    |
| 1.5381167 | 54 | 57           | 60          | C | 63 |
|           |    | -179.5623695 | 113.4466564 |   |    |
| 1.0964288 | 57 | 60           | 63          | H | 64 |
|           |    | 58.2875671   | 109.2323787 |   |    |
| 1.0964819 | 57 | 60           | 63          | H | 65 |
|           |    | -57.4687652  | 109.2276814 |   |    |
| 1.5381734 | 57 | 60           | 63          | C | 66 |
|           |    | -179.5748368 | 113.5238138 |   |    |
| 1.0963823 | 60 | 63           | 66          | H | 67 |
|           |    | 58.0166491   | 109.2046161 |   |    |
| 1.0963931 | 60 | 63           | 66          | H | 68 |
|           |    | -57.7077712  | 109.2239278 |   |    |
| 1.5380185 | 60 | 63           | 66          | C | 69 |
|           |    | -179.8481670 | 113.5367100 |   |    |
| 1.0966126 | 63 | 66           | 69          | H | 70 |
|           |    | -57.7004512  | 109.2593535 |   |    |

|           |    |              |             |   |    |
|-----------|----|--------------|-------------|---|----|
| 1.0965791 | 63 | 66           | 69          | H | 71 |
|           |    | 58.0578264   | 109.2680351 |   |    |
| 1.5383751 | 63 | 66           | 69          | C | 72 |
|           |    | -179.8075105 | 113.5946777 |   |    |
| 1.0955284 | 66 | 69           | 72          | H | 73 |
|           |    | 57.7813517   | 109.1232938 |   |    |
| 1.0955716 | 66 | 69           | 72          | H | 74 |
|           |    | -57.8267818  | 109.1426711 |   |    |
| 1.5359639 | 66 | 69           | 72          | C | 75 |
|           |    | 179.9823258  | 113.2416636 |   |    |
| 1.0920279 | 69 | 72           | 75          | H | 76 |
|           |    | 179.9262345  | 111.3983990 |   |    |
| 1.0930589 | 69 | 72           | 75          | H | 77 |
|           |    | -59.9604498  | 111.1128350 |   |    |
| 1.0930682 | 69 | 72           | 75          | H | 78 |
|           |    | 59.8239900   | 111.1028055 |   |    |
| 1.5380086 | 42 | 45           | 48          | C | 79 |
|           |    | 179.8403987  | 113.5397546 |   |    |
| 1.0965922 | 45 | 48           | 79          | H | 80 |
|           |    | -57.9472440  | 109.2579991 |   |    |
| 1.0966068 | 45 | 48           | 79          | H | 81 |
|           |    | 57.8091837   | 109.2666192 |   |    |
| 1.5383677 | 45 | 48           | 79          | C | 82 |
|           |    | 179.9311206  | 113.5869899 |   |    |
| 1.0955644 | 48 | 79           | 82          | H | 83 |
|           |    | 57.7572761   | 109.1372026 |   |    |
| 1.0955482 | 48 | 79           | 82          | H | 84 |
|           |    | -57.8496359  | 109.1354421 |   |    |
| 1.5359556 | 48 | 79           | 82          | C | 85 |
|           |    | 179.9542179  | 113.2511847 |   |    |
| 1.0920344 | 79 | 82           | 85          | H | 86 |
|           |    | 179.9993193  | 111.3926418 |   |    |
| 1.0930491 | 79 | 82           | 85          | H | 87 |
|           |    | -59.8990947  | 111.1109506 |   |    |

|                        |    |    |    |   |    |
|------------------------|----|----|----|---|----|
| 1.0930535              | 79 | 82 | 85 | H | 88 |
| 59.8962779 111.1132502 |    |    |    |   |    |

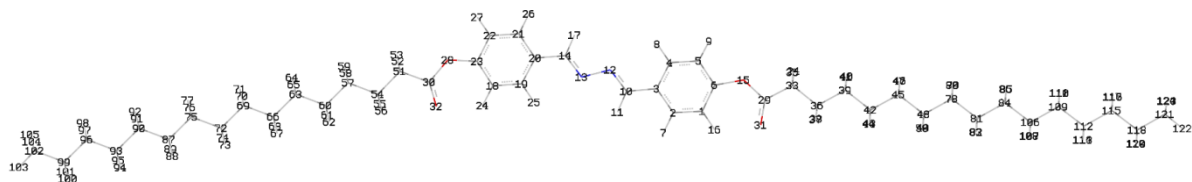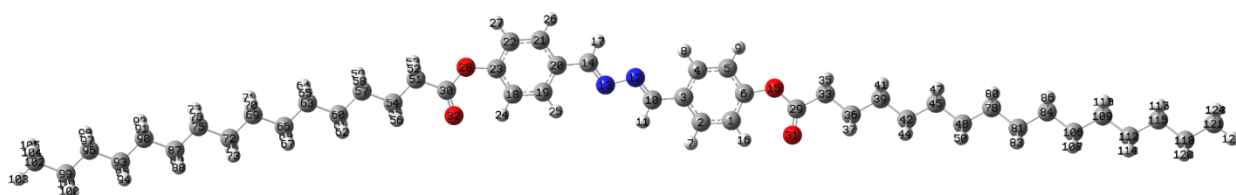

|             | Angle | Bond      | NC | NB | NASymbol     | Dihedral | Tag |
|-------------|-------|-----------|----|----|--------------|----------|-----|
|             |       |           |    |    |              |          |     |
|             |       |           |    |    |              | C        | 1   |
|             |       | 1.3967864 |    |    | 1            | C        | 2   |
| 121.7041385 |       | 1.4045457 |    | 1  | 2            | C        | 3   |
| 118.5767163 |       | 1.4106551 | 1  | 2  | 3            | C        | 4   |
|             |       |           |    |    | 0.1045446    |          |     |
| 120.3955879 |       | 1.3861212 | 2  | 3  | 4            | C        | 5   |
|             |       |           |    |    | -0.0720628   |          |     |
| 118.2752561 |       | 1.3963293 | 3  | 2  | 1            | C        | 6   |
|             |       |           |    |    | -0.0296376   |          |     |
| 118.8334989 |       | 1.0826318 | 6  | 1  | 2            | H        | 7   |
|             |       |           |    |    | -179.9493910 |          |     |
| 118.7946901 |       | 1.0798794 | 2  | 3  | 4            | H        | 8   |
|             |       |           |    |    | -179.9958881 |          |     |
| 121.5372877 |       | 1.0799650 | 3  | 4  | 5            | H        | 9   |
|             |       |           |    |    | -179.9923268 |          |     |

|             |           |    |    |    |                   |    |
|-------------|-----------|----|----|----|-------------------|----|
| 119.6375323 | 1.4581351 | 1  | 2  | 3  | C<br>-179.7121061 | 10 |
| 118.1641214 | 1.0891417 | 2  | 3  | 10 | H<br>-0.2235688   | 11 |
| 122.1096987 | 1.2956870 | 2  | 3  | 10 | N<br>179.5975725  | 12 |
| 112.9683999 | 1.4234191 | 3  | 10 | 12 | N<br>-179.7035576 | 13 |
| 112.7824928 | 1.2956033 | 10 | 12 | 13 | C<br>179.2420510  | 14 |
| 125.5359147 | 1.4162534 | 2  | 1  | 6  | O<br>-179.8587055 | 15 |
| 120.6468577 | 1.0749841 | 5  | 6  | 1  | H<br>-179.8830891 | 16 |
| 119.5832186 | 1.0893793 | 12 | 13 | 14 | H<br>0.1044325    | 17 |
| 104.2971534 | 3.7854669 | 12 | 13 | 14 | C<br>-179.6506128 | 18 |
| 18.7704810  | 1.3929754 | 13 | 14 | 18 | C<br>-0.9784610   | 19 |
| 121.4054696 | 1.4070350 | 14 | 18 | 19 | C<br>-0.3815721   | 20 |
| 118.5558702 | 1.4081544 | 18 | 19 | 20 | C<br>-0.1397037   | 21 |
| 120.7254009 | 1.3898622 | 19 | 20 | 21 | C<br>0.1834273    | 22 |
| 119.5024255 | 1.3965677 | 20 | 21 | 22 | C<br>-0.0319913   | 23 |
| 139.7196444 | 1.0751005 | 13 | 14 | 18 | H<br>-0.5084276   | 24 |
| 119.9817020 | 1.0801017 | 14 | 18 | 19 | H<br>179.5476659  | 25 |
| 119.6652985 | 1.0825245 | 19 | 20 | 21 | H<br>-179.9454554 | 26 |

|             |           |    |    |    |                   |    |
|-------------|-----------|----|----|----|-------------------|----|
| 121.6424357 | 1.0797572 | 20 | 21 | 22 | H<br>179.8567213  | 27 |
| 113.3000363 | 1.4165089 | 21 | 22 | 23 | O<br>179.6626732  | 28 |
| 126.7394303 | 1.3930970 | 1  | 6  | 15 | C<br>-2.3570999   | 29 |
| 126.7921479 | 1.3933432 | 22 | 23 | 28 | C<br>-179.7636783 | 30 |
| 124.0277949 | 1.2281535 | 6  | 15 | 29 | O<br>-0.1464662   | 31 |
| 124.0573208 | 1.2279268 | 23 | 28 | 30 | O<br>-0.9791957   | 32 |
| 109.4373629 | 1.5049092 | 6  | 15 | 29 | C<br>179.6731181  | 33 |
| 107.6451745 | 1.0947000 | 15 | 29 | 33 | H<br>-59.4480368  | 34 |
| 107.8797820 | 1.0938191 | 15 | 29 | 33 | H<br>53.8758806   | 35 |
| 113.5863830 | 1.5330153 | 15 | 29 | 33 | C<br>177.4201374  | 36 |
| 109.3627650 | 1.0933821 | 29 | 33 | 36 | H<br>-58.8583686  | 37 |
| 109.3799926 | 1.0930242 | 29 | 33 | 36 | H<br>56.7833208   | 38 |
| 112.2667828 | 1.5376020 | 29 | 33 | 36 | C<br>179.0017099  | 39 |
| 109.3730630 | 1.0966031 | 33 | 36 | 39 | H<br>-58.3780746  | 40 |
| 109.4484400 | 1.0965495 | 33 | 36 | 39 | H<br>57.5659293   | 41 |
| 113.2904453 | 1.5379064 | 33 | 36 | 39 | C<br>179.6133015  | 42 |
| 109.2349793 | 1.0960878 | 36 | 39 | 42 | H<br>57.4893476   | 43 |

|             |           |    |    |    |                  |    |
|-------------|-----------|----|----|----|------------------|----|
| 109.2300728 | 1.0961205 | 36 | 39 | 42 | H<br>-58.2847516 | 44 |
| 113.3344527 | 1.5380916 | 36 | 39 | 42 | C<br>179.6004668 | 45 |
| 109.1813410 | 1.0965035 | 39 | 42 | 45 | H<br>-58.0971482 | 46 |
| 109.2165894 | 1.0964825 | 39 | 42 | 45 | H<br>57.6026140  | 47 |
| 113.6345334 | 1.5381100 | 39 | 42 | 45 | C<br>179.7627939 | 48 |
| 109.2491446 | 1.0963669 | 42 | 45 | 48 | H<br>57.5941752  | 49 |
| 109.2462724 | 1.0963873 | 42 | 45 | 48 | H<br>-58.1771633 | 50 |
| 109.4604243 | 1.5051204 | 23 | 28 | 30 | C<br>178.8791021 | 51 |
| 107.7065457 | 1.0944564 | 28 | 30 | 51 | H<br>-58.2658926 | 52 |
| 107.8843694 | 1.0939658 | 28 | 30 | 51 | H<br>55.1326915  | 53 |
| 113.4641582 | 1.5330364 | 28 | 30 | 51 | C<br>178.6118797 | 54 |
| 109.3568885 | 1.0933032 | 30 | 51 | 54 | H<br>-58.9634934 | 55 |
| 109.3233600 | 1.0930629 | 30 | 51 | 54 | H<br>56.6213234  | 56 |
| 112.3873136 | 1.5376667 | 30 | 51 | 54 | C<br>178.8054826 | 57 |
| 109.4078029 | 1.0965498 | 51 | 54 | 57 | H<br>-58.1338367 | 58 |
| 109.4812157 | 1.0965283 | 51 | 54 | 57 | H<br>57.8766165  | 59 |
| 113.1682212 | 1.5379279 | 51 | 54 | 57 | C<br>179.9195766 | 60 |

|             |           |    |    |    |                   |    |
|-------------|-----------|----|----|----|-------------------|----|
| 109.2099893 | 1.0960751 | 54 | 57 | 60 | H<br>-58.3197425  | 61 |
| 109.1866092 | 1.0960883 | 54 | 57 | 60 | H<br>57.4093111   | 62 |
| 113.4431552 | 1.5381522 | 54 | 57 | 60 | C<br>179.5043108  | 63 |
| 109.2385777 | 1.0964547 | 57 | 60 | 63 | H<br>57.8576233   | 64 |
| 109.2126528 | 1.0964587 | 57 | 60 | 63 | H<br>-57.8955765  | 65 |
| 113.5373771 | 1.5381178 | 57 | 60 | 63 | C<br>-179.9963489 | 66 |
| 109.2127605 | 1.0963649 | 60 | 63 | 66 | H<br>57.6171278   | 67 |
| 109.2239250 | 1.0963488 | 60 | 63 | 66 | H<br>-58.1173617  | 68 |
| 113.5188829 | 1.5382920 | 60 | 63 | 66 | C<br>179.7234851  | 69 |
| 109.2040610 | 1.0964640 | 63 | 66 | 69 | H<br>-57.8777261  | 70 |
| 109.2104845 | 1.0964661 | 63 | 66 | 69 | H<br>57.8395481   | 71 |
| 113.5714953 | 1.5381334 | 63 | 66 | 69 | C<br>179.9887752  | 72 |
| 109.2126055 | 1.0964258 | 66 | 69 | 72 | H<br>57.7523844   | 73 |
| 109.2136915 | 1.0964161 | 66 | 69 | 72 | H<br>-57.9690275  | 74 |
| 113.5527148 | 1.5383085 | 66 | 69 | 72 | C<br>179.8793664  | 75 |
| 109.2089670 | 1.0964644 | 69 | 72 | 75 | H<br>-57.8877852  | 76 |
| 109.2004275 | 1.0964686 | 69 | 72 | 75 | H<br>57.8225727   | 77 |



|             |           |    |    |    |                  |    |
|-------------|-----------|----|----|----|------------------|----|
| 113.4287522 | 1.5382329 | 42 | 45 | 48 | C<br>179.7030435 | 78 |
| 109.1699430 | 1.0965121 | 45 | 48 | 78 | H<br>-57.9811364 | 79 |
| 109.2017646 | 1.0964854 | 45 | 48 | 78 | H<br>57.6919336  | 80 |
| 113.6477383 | 1.5381269 | 45 | 48 | 78 | C<br>179.8689846 | 81 |
| 109.2364741 | 1.0964321 | 48 | 78 | 81 | H<br>57.6443266  | 82 |
| 109.2392176 | 1.0964502 | 48 | 78 | 81 | H<br>-58.1061154 | 83 |
| 113.4807835 | 1.5382560 | 48 | 78 | 81 | C<br>179.7617994 | 84 |
| 109.1737515 | 1.0965126 | 78 | 81 | 84 | H<br>-57.9036422 | 85 |
| 109.2022217 | 1.0964828 | 78 | 81 | 84 | H<br>57.7711822  | 86 |
| 113.5740338 | 1.5381504 | 69 | 72 | 75 | C<br>179.9642605 | 87 |
| 109.2126197 | 1.0964452 | 72 | 75 | 87 | H<br>57.8587247  | 88 |
| 109.2067628 | 1.0964391 | 72 | 75 | 87 | H<br>-57.8561947 | 89 |
| 113.5670787 | 1.5383139 | 72 | 75 | 87 | C<br>179.9985325 | 90 |
| 109.2137020 | 1.0964518 | 75 | 87 | 90 | H<br>-57.8861903 | 91 |
| 109.1960587 | 1.0964581 | 75 | 87 | 90 | H<br>57.8233699  | 92 |
| 113.5759699 | 1.5381968 | 75 | 87 | 90 | C<br>179.9600900 | 93 |
| 109.2084636 | 1.0964716 | 87 | 90 | 93 | H<br>57.9283596  | 94 |

|             |           |    |     |     |                   |     |
|-------------|-----------|----|-----|-----|-------------------|-----|
| 109.2017172 | 1.0964658 | 87 | 90  | 93  | H<br>-57.7812554  | 95  |
| 113.5828545 | 1.5380719 | 87 | 90  | 93  | C<br>-179.9269052 | 96  |
| 109.2634533 | 1.0965912 | 90 | 93  | 96  | H<br>-57.8604214  | 97  |
| 109.2469429 | 1.0965926 | 90 | 93  | 96  | H<br>57.8824342   | 98  |
| 113.6224489 | 1.5383768 | 90 | 93  | 96  | C<br>-179.9948204 | 99  |
| 109.1363498 | 1.0955832 | 93 | 96  | 99  | H<br>57.9222587   | 100 |
| 109.1321100 | 1.0955446 | 93 | 96  | 99  | H<br>-57.6910673  | 101 |
| 113.2447412 | 1.5360381 | 93 | 96  | 99  | C<br>-179.8946227 | 102 |
| 111.4189009 | 1.0920742 | 96 | 99  | 102 | H<br>-179.8117447 | 103 |
| 111.0899201 | 1.0930954 | 96 | 99  | 102 | H<br>-59.6966665  | 104 |
| 111.1029401 | 1.0930557 | 96 | 99  | 102 | H<br>60.0639591   | 105 |
| 113.6292347 | 1.5381363 | 78 | 81  | 84  | C<br>179.9492126  | 106 |
| 109.2262525 | 1.0964555 | 81 | 84  | 106 | H<br>57.6876253   | 107 |
| 109.2323796 | 1.0964736 | 81 | 84  | 106 | H<br>-58.0474211  | 108 |
| 113.5171218 | 1.5382718 | 81 | 84  | 106 | C<br>179.8126413  | 109 |
| 109.1818074 | 1.0964965 | 84 | 106 | 109 | H<br>-57.8571438  | 110 |
| 109.2055566 | 1.0964693 | 84 | 106 | 109 | H<br>57.8271983   | 111 |

|             |           |     |     |     |              |     |
|-------------|-----------|-----|-----|-----|--------------|-----|
| 113.6049787 | 1.5381706 | 84  | 106 | 109 | C            | 112 |
|             |           |     |     |     | 179.9994200  |     |
| 109.2149692 | 1.0964841 | 106 | 109 | 112 | H            | 113 |
|             |           |     |     |     | 57.7321054   |     |
| 109.2210810 | 1.0965037 | 106 | 109 | 112 | H            | 114 |
|             |           |     |     |     | -57.9857825  |     |
| 113.5626137 | 1.5380447 | 106 | 109 | 112 | C            | 115 |
|             |           |     |     |     | 179.8688257  |     |
| 109.2432025 | 1.0966249 | 109 | 112 | 115 | H            | 116 |
|             |           |     |     |     | -57.8602740  |     |
| 109.2595380 | 1.0966001 | 109 | 112 | 115 | H            | 117 |
|             |           |     |     |     | 57.8720983   |     |
| 113.6155543 | 1.5383510 | 109 | 112 | 115 | C            | 118 |
|             |           |     |     |     | -179.9838093 |     |
| 109.1333921 | 1.0955824 | 112 | 115 | 118 | H            | 119 |
|             |           |     |     |     | 57.7455212   |     |
| 109.1395450 | 1.0956028 | 112 | 115 | 118 | H            | 120 |
|             |           |     |     |     | -57.8575240  |     |
| 113.2619023 | 1.5359938 | 112 | 115 | 118 | C            | 121 |
|             |           |     |     |     | 179.9471829  |     |
| 111.4049687 | 1.0920810 | 115 | 118 | 121 | H            | 122 |
|             |           |     |     |     | 179.9532475  |     |
| 111.1081905 | 1.0930629 | 115 | 118 | 121 | H            | 123 |
|             |           |     |     |     | -59.9367957  |     |
| 111.1047498 | 1.0930616 | 115 | 118 | 121 | H            | 124 |
|             |           |     |     |     | 59.8430866   |     |

## References:

1. Frisch, M.; Trucks, G.; Schlegel, H.B.; Scuseria, G.; Robb, M.; Cheeseman, J.; Scalmani, G.; Barone, V.; Mennucci, B.; Petersson, G. Gaussian 09, revision a. 02, gaussian. Inc., Wallingford, CT **2009**, 200.
2. Dennington, R.; Keith, T.; Millam, J. GaussView, version 5. **2009**.
